# Supplementary material for: Heterotrophic nitrification and aerobic denitrification by a novel groundwater origin cold-adapted bacterium at low temperatures
Source: Royal Society of Chemistry journal article supplement (doi:10.1039/c4ra13141j), 2014-12-17
Supplement: c4ra13141j1.pdf [file c4ra13141j1.pdf]

**Table S1**

Box-Behnken design matrix and the responses of the dependent variables nitrate removal efficiency

| Run order | Independent variables,<br>coded levels |                             |                             | Dependent variables,<br>NO <sub>3</sub> <sup>-</sup> -N removal efficiency (%) |              |
|-----------|----------------------------------------|-----------------------------|-----------------------------|--------------------------------------------------------------------------------|--------------|
|           | X <sub>1</sub> <sup>a</sup>            | X <sub>2</sub> <sup>b</sup> | X <sub>3</sub> <sup>c</sup> | Predicted                                                                      | Experimental |
|           | 1                                      | 0                           | 1                           | -1                                                                             | 0.1109       |
| 2         | 0                                      | 0                           | 0                           | 0.4803                                                                         | 0.5071±0.046 |
| 3         | -1                                     | -1                          | 0                           | 0.494                                                                          | 0.5050±0.041 |
| 4         | 0                                      | 1                           | 1                           | 0.104                                                                          | 0.1050±0.016 |
| 5         | 0                                      | -1                          | 1                           | 0.428                                                                          | 0.4254±0.052 |
| 6         | 1                                      | -1                          | 0                           | 0.2703                                                                         | 0.2630±0.072 |
| 7         | 0                                      | 0                           | 0                           | 0.4803                                                                         | 0.4574±0.050 |
| 8         | 1                                      | 1                           | 0                           | 0.0663                                                                         | 0.0553±0.089 |
| 9         | 1                                      | 0                           | 1                           | 0.2727                                                                         | 0.2825±0.018 |
| 10        | 1                                      | 0                           | -1                          | 0.3069                                                                         | 0.3153±0.018 |
| 11        | 0                                      | 0                           | 0                           | 0.4803                                                                         | 0.4223±0.058 |
| 12        | 0                                      | -1                          | -1                          | 0.4337                                                                         | 0.4326±0.043 |
| 13        | -1                                     | 0                           | 1                           | 0.4049                                                                         | 0.3964±0.021 |
| 14        | 0                                      | 0                           | 0                           | 0.4803                                                                         | 0.5071±0.046 |
| 15        | -1                                     | 1                           | 0                           | 0.0592                                                                         | 0.0665±0.020 |
| 16        | 0                                      | 0                           | 0                           | 0.4803                                                                         | 0.5071±0.046 |
| 17        | -1                                     | 0                           | -1                          | 0.3914                                                                         | 0.3815±0.047 |

<sup>a</sup> refers to NO<sub>3</sub><sup>-</sup>-N concentration: -1 (60 mg L<sup>-1</sup>), 0 (70 mg L<sup>-1</sup>), +1 (80 mg L<sup>-1</sup>);

<sup>b</sup> refers to initial pH: -1 (6), 0 (7.5), +1 (9);

<sup>c</sup> refers to initial DO concentration: -1 (6 mg L<sup>-1</sup>), 0 (7.5 mg L<sup>-1</sup>), +1 (9 mg L<sup>-1</sup>).
